# Supplementary material
Source: PubMed Central journal article supplement (PMC11180544)
Supplement: NIHMS1997806-supplement-1.pdf [file NIHMS1997806-supplement-1.pdf]

**Supplementary Table 1 (online only).** Characteristics of participants with and without missing 1-year Peripheral Artery Questionnaire (PAQ) scores

|                                      | Missing    | Total        | 12-month PAQ score | Missing 12-month PAQ score | SMD    |
|--------------------------------------|------------|--------------|--------------------|----------------------------|--------|
| <b>Demographic</b>                   |            |              |                    |                            |        |
| Age, years <sup>a</sup>              | 0 (0.0)    | 67.58 (9.41) | 67.65 (9.27)       | 67.20 (10.13)              | 0.046  |
| Sex                                  | 0 (0.0)    |              |                    |                            |        |
| Male                                 |            | 793 (62.2)   | 676 (63.0)         | 117 (57.9)                 | 0.104  |
| Female                               |            | 482 (37.8)   | 397 (37.0)         | 85 (42.1)                  |        |
| Race                                 | 0 (0.0)    |              |                    |                            |        |
| Non-White                            |            | 228 (17.9)   | 189 (17.6)         | 39 (19.3)                  | 0.044  |
| White                                |            | 1047 (82.1)  | 884 (82.4)         | 163 (80.7)                 |        |
| Married                              | 7 (0.5)    | 753 (59.4)   | 636 (59.6)         | 117 (58.2)                 | 0.028  |
| Country                              | 0 (0.0)    |              |                    |                            |        |
| Non-United States                    |            | 478 (37.5)   | 407 (37.9)         | 71 (35.1)                  | 0.058  |
| United States                        |            | 797 (62.5)   | 666 (62.1)         | 131 (64.9)                 |        |
| <b>Socioeconomic</b>                 |            |              |                    |                            |        |
| Education—high school or above       | 12 (0.9)   | 873 (69.1)   | 749 (70.3)         | 124 (62.9)                 | 0.156  |
| Insured                              | 0 (0.0)    | 1265 (99.2)  | 1064 (99.2)        | 201 (99.5)                 | 0.042  |
| Working for pay                      | 6 (0.5)    | 303 (23.9)   | 260 (24.3)         | 43 (21.4)                  | 0.07   |
| Avoidance of care due to cost        | 10 (0.8)   | 178 (14.1)   | 148 (13.9)         | 30 (14.9)                  | 0.029  |
| <b>Psychosocial</b>                  |            |              |                    |                            |        |
| PHQ-8 depression score <sup>a</sup>  | 32 (2.5)   | 4.72 (5.03)  | 4.46 (4.80)        | 6.10 (5.95)                | −0.303 |
| PSS-4 stress score <sup>a</sup>      | 21 (1.6)   | 3.94 (3.40)  | 3.81 (3.30)        | 4.66 (3.82)                | −0.239 |
| GAD-2 anxiety score <sup>a</sup>     | 10 (0.8)   | 1.04 (1.58)  | 0.95 (1.51)        | 1.48 (1.87)                | −0.311 |
| Low social support (ESSI)            | 13 (1.0)   | 203 (16.1)   | 167 (15.7)         | 36 (18.1)                  | 0.064  |
| <b>Comorbidities</b>                 |            |              |                    |                            |        |
| Alcohol abuse                        | 0 (0.0)    | 78 (6.1)     | 63 (5.9)           | 15 (7.4)                   | 0.062  |
| Atrial fibrillation                  | 0 (0.0)    | 143 (11.2)   | 125 (11.6)         | 18 (8.9)                   | 0.09   |
| Cancer                               | 0 (0.0)    | 129 (10.1)   | 109 (10.2)         | 20 (9.9)                   | 0.009  |
| Chronic back pain                    | 0 (0.0)    | 174 (13.6)   | 149 (13.9)         | 25 (12.4)                  | 0.045  |
| Chronic kidney disease               | 0 (0.0)    | 143 (11.2)   | 115 (10.7)         | 28 (13.9)                  | 0.096  |
| Chronic lung disease                 | 0 (0.0)    | 220 (17.3)   | 176 (16.4)         | 44 (21.8)                  | 0.137  |
| Congestive heart failure             | 0 (0.0)    | 127 (10.0)   | 104 (9.7)          | 23 (11.4)                  | 0.055  |
| Depression, current                  | 0 (0.0)    | 154 (12.1)   | 113 (10.5)         | 41 (20.3)                  | 0.273  |
| Diabetes                             | 0 (0.0)    | 423 (33.2)   | 350 (32.6)         | 73 (36.1)                  | 0.074  |
| Dyslipidemia                         | 0 (0.0)    | 1016 (79.7)  | 857 (79.9)         | 159 (78.7)                 | 0.029  |
| Hypertension                         | 0 (0.0)    | 1018 (79.8)  | 865 (80.6)         | 153 (75.7)                 | 0.118  |
| Osteoarthritis (hip or knee)         | 0 (0.0)    | 118 (9.3)    | 98 (9.1)           | 20 (9.9)                   | 0.026  |
| PCI/CABG                             | 0 (0.0)    | 447 (35.1)   | 382 (35.6)         | 65 (32.2)                  | 0.072  |
| Prior CVA                            | 0 (0.0)    | 98 (7.7)     | 80 (7.5)           | 18 (8.9)                   | 0.053  |
| Prior TIA                            | 0 (0.0)    | 69 (5.4)     | 55 (5.1)           | 14 (6.9)                   | 0.076  |
| Sleep apnea                          | 0 (0.0)    | 103 (8.1)    | 90 (8.4)           | 13 (6.4)                   | 0.075  |
| Smoking status                       | 3 (0.2)    | 1134 (89.2)  | 957 (89.4)         | 177 (88.1)                 | 0.041  |
| BMI, m <sup>2</sup> /kg <sup>a</sup> | 273 (21.4) | 28.96 (6.04) | 29.10 (6.05)       | 28.20 (5.95)               | 0.15   |
| <b>PAD characteristics</b>           |            |              |                    |                            |        |
| Duration of symptoms—>6 months       | 182 (14.3) | 735 (67.2)   | 626 (67.8)         | 109 (64.1)                 | 0.078  |
| Symptomatic leg(s)—single            | 0 (0.0)    | 628 (49.3)   | 530 (49.4)         | 98 (48.5)                  | 0.018  |
| Prior surgical bypass                | 0 (0.0)    | 102 (8.0)    | 83 (7.7)           | 19 (9.4)                   | 0.06   |
| Prior endovascular intervention      | 0 (0.0)    | 351 (27.5)   | 291 (27.1)         | 60 (29.7)                  | 0.057  |
| Symptom presentation—new onset       | 0 (0.0)    | 667 (52.3)   | 560 (52.2)         | 107 (53.0)                 | 0.016  |

(Continued on next page)

**Supplementary Table I (online only).** Continued.

|                                                                                                                                                                                                                                                                                                                                                                                                                                                                                                                                                                                                                                                              | Missing    | Total         | 12-month PAQ score | Missing 12-month PAQ score | SMD   |
|--------------------------------------------------------------------------------------------------------------------------------------------------------------------------------------------------------------------------------------------------------------------------------------------------------------------------------------------------------------------------------------------------------------------------------------------------------------------------------------------------------------------------------------------------------------------------------------------------------------------------------------------------------------|------------|---------------|--------------------|----------------------------|-------|
| Rutherford symptom classification                                                                                                                                                                                                                                                                                                                                                                                                                                                                                                                                                                                                                            | 20 (1.6)   |               |                    |                            |       |
| Mild/moderate                                                                                                                                                                                                                                                                                                                                                                                                                                                                                                                                                                                                                                                |            | 906 (72.2)    | 758 (71.5)         | 148 (75.9)                 | 0.1   |
| Severe                                                                                                                                                                                                                                                                                                                                                                                                                                                                                                                                                                                                                                                       |            | 349 (27.8)    | 302 (28.5)         | 47 (24.1)                  |       |
| ABI <sup>a</sup>                                                                                                                                                                                                                                                                                                                                                                                                                                                                                                                                                                                                                                             | 7 (0.5)    | 0.67 (0.19)   | 0.67 (0.19)        | 0.66 (0.19)                | 0.016 |
| Symptom type—typical                                                                                                                                                                                                                                                                                                                                                                                                                                                                                                                                                                                                                                         | 372 (29.2) | 757 (83.8)    | 643 (84.9)         | 114 (78.1)                 | 0.177 |
| Initial invasive treatment                                                                                                                                                                                                                                                                                                                                                                                                                                                                                                                                                                                                                                   | 0 (0.0)    | 316 (24.8)    | 281 (26.2)         | 35 (17.2)                  | 0.216 |
| PAD care metrics                                                                                                                                                                                                                                                                                                                                                                                                                                                                                                                                                                                                                                             |            |               |                    |                            |       |
| Referral to SET                                                                                                                                                                                                                                                                                                                                                                                                                                                                                                                                                                                                                                              | 71 (5.6)   | 280 (23.3)    | 229 (22.7)         | 51 (26.0)                  | 0.077 |
| Statin prescribed                                                                                                                                                                                                                                                                                                                                                                                                                                                                                                                                                                                                                                            | 6 (0.5)    | 1023 (80.6)   | 864 (81.0)         | 159 (78.7)                 | 0.056 |
| Antiplatelet prescribed                                                                                                                                                                                                                                                                                                                                                                                                                                                                                                                                                                                                                                      | 6 (0.5)    | 978 (77.1)    | 824 (77.2)         | 154 (76.2)                 | 0.023 |
| Cilostazol prescribed                                                                                                                                                                                                                                                                                                                                                                                                                                                                                                                                                                                                                                        | 6 (0.5)    | 151 (11.9)    | 129 (12.1)         | 22 (10.9)                  | 0.038 |
| Physical activity level—sedentary                                                                                                                                                                                                                                                                                                                                                                                                                                                                                                                                                                                                                            | 21 (1.6)   | 514 (41.0)    | 414 (39.2)         | 100 (50.5)                 | 0.229 |
| Baseline health status                                                                                                                                                                                                                                                                                                                                                                                                                                                                                                                                                                                                                                       |            |               |                    |                            |       |
| EQ-5D-VAS score <sup>a</sup>                                                                                                                                                                                                                                                                                                                                                                                                                                                                                                                                                                                                                                 | 74 (5.8)   | 66.23 (19.26) | 66.66 (19.00)      | 63.92 (20.48)              | 0.139 |
| PAQ summary score <sup>a</sup>                                                                                                                                                                                                                                                                                                                                                                                                                                                                                                                                                                                                                               | 1 (0.08)   | 49.14 (21.84) | 49.75 (21.68)      | 45.89 (22.49)              | 0.175 |
| <i>ABI</i> , Ankle brachial index; <i>BMI</i> , body mass index; <i>CABG</i> , coronary artery bypass graft; <i>CVA</i> , cerebrovascular accident; <i>EQ-5D-VAS</i> , EuroQoL Five Dimensions Questionnaire visual analog scale; <i>ESSI</i> , ENRICH Social Support Inventory; <i>GAD-2</i> , Generalized Anxiety Disorder-2 Item; <i>PAD</i> , peripheral artery disease; <i>PCI</i> , percutaneous coronary intervention; <i>PHQ-8</i> , Patient Health Questionnaire-8 Item; <i>PSS-4</i> , Perceived Stress Scale-4 Item; <i>SET</i> , supervised exercise therapy; <i>SMD</i> , standardized mean difference; <i>TIA</i> , transient ischemic attack. |            |               |                    |                            |       |
| <sup>a</sup> Analyzed continuously as mean (standard deviation); all other variables shown as number (%).                                                                                                                                                                                                                                                                                                                                                                                                                                                                                                                                                    |            |               |                    |                            |       |

**Supplementary Table II (online only).** Correlation matrix for variables of importance in the random forest model

|                              | PAQ summary score (baseline) | PHQ-8 depression | GAD-2 anxiety | Symptom presentation | Insurance | History of depression | Low social support | Invasive treatment | Symptom duration | Race |
|------------------------------|------------------------------|------------------|---------------|----------------------|-----------|-----------------------|--------------------|--------------------|------------------|------|
| PAQ summary score (baseline) | 1.00                         |                  |               |                      |           |                       |                    |                    |                  |      |
| PHQ-8 depression             | -0.53                        | 1.00             |               |                      |           |                       |                    |                    |                  |      |
| GAD-2 anxiety                | -0.36                        | 0.59             | 1.00          |                      |           |                       |                    |                    |                  |      |
| Symptom presentation         | -0.04                        | -0.04            | -0.03         | 1.00                 |           |                       |                    |                    |                  |      |
| Insurance                    | 0.03                         | -0.07            | -0.01         | 0.01                 | 1.00      |                       |                    |                    |                  |      |
| History of depression        | -0.12                        | 0.18             | 0.17          | 0.06                 | -0.08     | 1.00                  |                    |                    |                  |      |
| Low social support           | -0.19                        | 0.25             | 0.16          | 0.02                 | -0.05     | 0.07                  | 1.00               |                    |                  |      |
| Invasive treatment           | -0.14                        | -0.01            | 0.01          | 0.04                 | -0.03     | -0.03                 | -0.10              | 1.00               |                  |      |
| Symptom duration             | -0.02                        | 0.05             | -0.01         | 0.34                 | -0.03     | 0.03                  | 0.08               | -0.12              | 1.00             |      |
| Race                         | 0.08                         | -0.04            | -0.01         | -0.16                | 0.10      | -0.11                 | -0.05              | -0.01              | -0.07            | 1.00 |

GAD-2, Generalized Anxiety Disorder-2 Item; PAQ, Peripheral Artery Questionnaire; PHQ-8, Patient Health Questionnaire-8 Item. Values shown are the Pearson correlation coefficient.

**Supplementary Table III (online only).** Model estimates and confidence intervals (CIs) for variables in the base and extended models predicting the 1-year mean Peripheral Artery Questionnaire (PAQ) score

| Variable                                   | Base model            |         | Extended model        |         |
|--------------------------------------------|-----------------------|---------|-----------------------|---------|
|                                            | Estimate (95% CI)     | P value | Estimate (95% CI)     | P value |
| Baseline PAQ summary score (per 10 points) | 4.74 (3.93, 5.54)     | <.001   | 4.32 (3.48, 5.16)     | <.001   |
| PHQ-8 depression                           | -0.39 (-0.81, 0.25)   | .066    | -0.37 (-0.80, 0.06)   | .089    |
| GAD-2 anxiety                              | -0.31 (-1.4, 0.86)    | .603    | -0.25 (-1.45, 0.95)   | .682    |
| Symptom presentation                       | -4.51 (-7.71, 1.31)   | .006    | -3.66 (-7.11, -0.21)  | .038    |
| Insurance                                  | -18.24 (-43.02, 6.54) | .149    | -17.71 (-42.29, 6.87) | .158    |
| History of depression                      | -6.77 (-11.75, -1.77) | .008    | -5.09 (-10.10, -0.08) | .047    |
| Low social support                         | -5.77 (-9.79, -1.76)  | .005    | -6.40 (-10.44, -2.36) | .002    |
| Invasive treatment                         | 12.93 (8.75, 19.11)   | <.001   | 12.29 (7.11, 17.48)   | <.001   |
| Symptom duration                           | -3.23 (-6.37, -0.09)  | .044    | -2.69 (-5.88, 0.049)  | .097    |
| Race                                       | 31.29 (14.45, 48.12)  | <.001   | 31.30 (14.56, 48.04)  | <.001   |
| Age (per 10 years)                         | —                     | —       | -2.66 (-0.44, -0.09)  | .003    |
| Sex (female)                               | —                     | —       | -2.02 (-5.25, 1.20)   | .219    |
| >High school education                     | —                     | —       | 0.85 (-2.54, 4.24)    | .624    |
| Cancer                                     | —                     | —       | 1.28 (-3.61, 6.18)    | .606    |
| Lung disease                               | —                     | —       | -3.71 (-7.62, 0.19)   | .062    |
| Diabetes                                   | —                     | —       | -2.69 (-6.01, 0.62)   | .112    |
| PCI/CABG                                   | —                     | —       | 1.71 (-1.54, 4.96)    | .303    |
| Sleep apnea                                | —                     | —       | -2.95 (-8.59, 2.70)   | .306    |
| Back pain                                  | —                     | —       | 0.61 (-3.53, 4.75)    | .772    |
| ABI                                        | —                     | —       | 0.04 (-7.93, 8.02)    | .992    |
| CVA                                        | —                     | —       | -5.38 (-10.68, -0.08) | .047    |
| Osteoarthritis                             | —                     | —       | 0.30 (-5.08, 5.68)    | .912    |
| CKD                                        | —                     | —       | -5.43 (-10.36, -0.52) | .030    |
| Smoking                                    | —                     | —       | -1.80 (-6.81, 3.20)   | .480    |
| BMI                                        | —                     | —       | -0.22 (-0.50, 0.53)   | .113    |
| Prior PVI                                  | —                     | —       | -0.05 (-3.65, 3.54)   | .977    |
| Atypical symptoms                          | —                     | —       | -0.16 (-4.23, 3.90)   | .937    |
| Activity level (nonsedentary)              | —                     | —       | 1.01 (-2.13, 4.15)    | .528    |
| Avoidance of care due to cost              | —                     | —       | -8.41 (-12.68, -4.14) | <.001   |

ABI, Ankle brachial index; BMI, body mass index; CABG, coronary artery bypass graft; CKD, chronic kidney disease; CVA, cerebrovascular accident; GAD-2, Generalized Anxiety Disorder-2 Item; PCI, percutaneous coronary intervention; PHQ-8, Patient Health Questionnaire-8 Item; PVI, peripheral vascular intervention.

**Supplementary Table IV (online only).** Model estimates and confidence intervals (CIs) for variables in the base predicting the 1-year mean Peripheral Artery Questionnaire (PAQ) score stratified by country (United States vs non-United States)

| Variable                                    | United States         |         | Non-United States      |         |
|---------------------------------------------|-----------------------|---------|------------------------|---------|
|                                             | Estimate (95% CI)     | P value | Estimate (95% CI)      | P value |
| PAQ summary score (baseline, per 10 points) | 4.66 (3.79, 5.59)     | <.001   | 4.49 (3.33, 5.65)      | <.001   |
| PHQ-8 depression                            | -0.15 (-0.63, 0.33)   | .541    | -0.5 (-1.17, 0.04)     | .068    |
| GAD-2 anxiety                               | -1.91 (-3.30, -0.52)  | .007    | 0.87 (-0.78, 2.52)     | .300    |
| Symptom presentation                        | -2.74 (-6.27, 0.79)   | .127    | -8.32 (-13.13, -3.50)  | .001    |
| Insurance                                   | 16.26 (0.90, 31.61)   | .038    | 0 (omitted)            | N/A     |
| History of depression                       | -5.58 (-10.55, -0.62) | .028    | -6.75 (-15.65, 2.14)   | .136    |
| Low social support                          | -4.06 (-8.83, 0.71)   | .095    | -10.34 (-15.91, -4.77) | <.001   |
| Invasive treatment                          | 7.52 (3.84, 11.20)    | <.001   | 13.43 (8.29, 18.59)    | <.001   |
| Symptom duration                            | -5.04 (-8.87, -1.22)  | .010    | -0.63 (-4.99, 3.72)    | .774    |
| Race                                        | 3.74 (0.02, 7.47)     | .049    | 30.35 (13.64, 47.07)   | <.001   |

*GAD-2*, Generalized Anxiety Disorder-2 Item; N/A, not applicable; *PHQ-8*, Patient Health Questionnaire-8 Item.
